# Supplementary material for: Early Trauma Is Associated with Poor Pharmacological Treatment Response in Patients with Panic Disorder
Source: PubMed Central journal article supplement — Psychiatry Investig. 2021 Mar 19;18(3):249–56. doi: 10.30773/pi.2020.0380 (PMC8016688; doi:10.30773/pi.2020.0380), 2021-03-19
Supplement: pi-2020-0380-suppl1.pdf [file pi-2020-0380-suppl1.pdf]

**Supplementary Table 1.** Binary logistic regression results predicting pharmacological treatment response in 6 months

| Variables                                | B      | p      | Odds ratio (CI 95%) |
|------------------------------------------|--------|--------|---------------------|
| ETI-physical subtype (total sum)         | -0.343 | 0.004* | 0.709 (0.562–0.895) |
| Level of education (high school or more) | 0.954  | 0.020* | 2.595 (1.161–5.800) |
| PDSS at baseline (total sum)             | 0.089  | 0.007* | 1.093 (1.025–1.166) |
| Constant                                 | -1.707 | 0.003  | 0.181               |

-2 log likelihood=177.051,  $\chi^2$  (df)=19.179(3) (p=0.000), Cox & Snell  $R^2$ =0.121, overall percentage=69.1%, reference group is the level of education (high school or more). \*p<0.05. Criteria for treatment response: when the PDSS score at each time point is reduced by 40% or more compared to the PDSS score at the beginning of treatment, it is set as a treatment response. ETI: Early Traumatic Inventory, PDSS: Panic Disorder Severity Scale, CI: confidence interval
